# Supplementary material for: Binding of carbon dioxide and acetylene to free carboxylic acid sites in a metal–organic framework
Source: Royal Society of Chemistry journal article supplement (doi:10.1039/d4sc00101j), 2024-01-01
Supplement: d4sc00101j1.pdf [file d4sc00101j1.pdf]

## Supporting Information

### Binding of carbon dioxide and acetylene to free carboxylic acid sites in a metal-organic framework

Christopher Marsh<sup>1</sup>, Xue Han<sup>1,2</sup>, Zhenzhong Lu<sup>1</sup>, Ivan da Silva<sup>3</sup>, Yongqiang Cheng<sup>4</sup>, Luke L. Daemen<sup>4</sup>, Sarah J. Day<sup>5</sup>, Stephen P. Thompson<sup>5</sup>, Anibal J. Ramirez-Cuesta<sup>4</sup>, Sihai Yang<sup>1,6\*</sup> and Martin Schröder<sup>1\*</sup>

1. Department of Chemistry, University of Manchester, Manchester, M13 9PL, UK

E-mails: Sihai.Yang@manchester.ac.uk; [M.Schroder@manchester.ac.uk](mailto:M.Schroder@manchester.ac.uk)

2. College of Chemistry Beijing Normal University, Beijing 100875, China

3. ISIS Neutron and Muon Source, Rutherford Appleton Laboratory, Oxford, OX11 0QX, UK

4. Neutron Scattering Division, Neutron Sciences Directorate, Oak Ridge National Laboratory, Oak Ridge, TN 37831, USA

5. Diamond Light Source, Harwell Science Campus, Oxford, OX11 0DE, UK

6. Beijing National Laboratory for Molecular Sciences, College of Chemistry and Molecular Engineering, Peking University, Beijing 100871, China

Email: Sihai.Yang@pku.edu.cn

## 1. Experimental methods and procedures

**Chemicals:** Aluminum chloride ( $\text{AlCl}_3$ , >99%, Fluka) and hydrochloric acid ( $\text{HCl}$ , >99%, Fischer Scientific) were used as purchased. Biphenyl-3,3',5,5'-tetracarboxylic acid ( $\text{H}_4\text{L}$ ) was synthesised by the literature method.<sup>1</sup>

### Methods

#### Synthesis of $[\text{Al}(\text{OH})(\text{C}_{16}\text{O}_8\text{H}_8)](\text{H}_2\text{O})_2$ (MFM-303-solvate):

Biphenyl-3,3',5,5'-tetracarboxylic acid (60 mg, 0.182 mmol) and  $\text{AlCl}_3$  (121.2 mg, 0.909 mmol) were combined in water (10 mL) acidified with 2%  $\text{HCl}$  (2 mL) and placed in a PTFE-lined stainless steel autoclave. The autoclave was sealed and heated for 3 days at 483 K. The white crystalline product was isolated by filtration, washed with water and dried in air. Yield: 59.1 mg (79.6% based on ligand). Elemental analysis (% calc/found):  $\text{AlO}_{11}\text{C}_{16}\text{H}_{13}$  (C 47.07/46.90, H 3.22/3.32, N 0.0/0.0). Selected IR (ATR):  $\nu/\text{cm}^{-1}$ : 3085(w), 1683 (m), 1615 (m), 1579 (s), 1409(m), 1246(m), 1167(m), 1089 (m), 986(s), 803(m), 764(s), 648(m).

#### Gas adsorption isotherms

Gravimetric isotherms were measured on an IGA system (Hiden Isochema) under ultra-high vacuum in a clean system with a diaphragm and turbo pumping system. All gases were ultra-pure research-grade (99.9999%) and were purchased from BOC and used as received. The as-synthesised MOF was outgassed at 393 K over 18 h prior to measurement.

#### Calculation of Ideal Adsorbed Solution Theory (IAST) selectivities

The pure component isotherms were fitted using the dual-site Langmuir-Freundlich model, and selectivities ( $S$ ) calculated using the IAST equation below, where  $x_i$  is the amount of each component adsorbed, and  $y_i$  is the mole fraction of each component in the gas phase at equilibrium:

$$S = \frac{\left(\frac{x_1}{y_1}\right)}{\left(\frac{x_2}{y_2}\right)}$$

#### Dynamic gas breakthrough experiments

Breakthrough experiments were carried out in a fixed-bed tube (7 mm diameter, 120 mm length) packed with 2.33 g of MFM-303. The sample was activated by heating under a flow of He for 1 day at 423 K. The fixed bed was cooled to 333 K using a water bath and breakthrough experiments performed using a flow of 1:1  $\text{C}_2\text{H}_2:\text{C}_2\text{H}_4$  or  $\text{C}_2\text{H}_4:\text{C}_2\text{H}_6$  at atmospheric pressure with a combined flow rate of  $4 \text{ mL min}^{-1}$ . The concentration of gases was determined by mass spectrometry and compared with the inlet concentration  $C_0$ , where  $C/C_0 = 1$  indicates complete breakthrough.

### **High-resolution synchrotron powder X-ray diffraction and structure determination of binding domains for adsorbed CO<sub>2</sub> and C<sub>2</sub>H<sub>2</sub> molecules**

High resolution *in situ* synchrotron X-ray powder diffraction (SXPd) data were collected at Beamline I11 of Diamond Light Source using multi-analysing crystal-detectors (MACs) and monochromated radiation ( $\lambda = 0.825774 \text{ \AA}$ ). The powder sample was loaded into a capillary tube of 0.7 mm diameter, degassed at 393 K, gas loaded at 298 K and the data collection was carried out at 200 K to minimise the disorder of guest molecules. The sample was reactivated between different gas loadings.

### **Inelastic neutron scattering**

Inelastic neutron scattering (INS) measurements were obtained using the VISION spectrometer at the Spallation Neutron Source, Oak Ridge National Laboratory. The sample was loaded in an aluminium can, degassed at 393 K over 24 h and data collected at <10 K. Gases were dosed at room temperature and the sample cooled to <10 K before data collection.

## 2. Crystallographic data

**Table S1.** Summary of crystallographic data for gas-loaded MFM-303

|                                |                                        |                                     |
|--------------------------------|----------------------------------------|-------------------------------------|
| Chemical formula               | $C_{16}H_8AlO_9 \cdot 1.61(CO_2)$      | $C_{16}H_8AlO_9 \cdot 1.45(C_2H_2)$ |
| $M_r$                          | 442.15                                 | 407.41                              |
| Crystal system,<br>space group | Monoclinic, $C2/c$                     | Monoclinic, $C2/c$                  |
| Temperature (K)                | 200                                    | 200                                 |
| $a, b, c$ (Å)                  | 14.24522(16), 19.7916(3), 13.0818(2)   | 14.4863(3), 20.0386(3), 13.2442(2)  |
| $\beta$ (°)                    | 92.544 (13)                            | 93.0825(17)                         |
| $V$ (Å <sup>3</sup> )          | 3654.25                                | 3839.03(11)                         |
| $Z$                            | 8                                      | 8                                   |
| Radiation type                 | synchrotron, $\lambda = 0.825774(2)$ Å |                                     |
| Refinement                     |                                        |                                     |
| $R_{wp}$ (%)                   | 9.15                                   | 9.50                                |
| $R_{exp}$ (%)                  | 2.79                                   | 3.99                                |
| $R_p$ (%)                      | 6.59                                   | 6.71                                |
| GoF                            | 3.29                                   | 2.38                                |

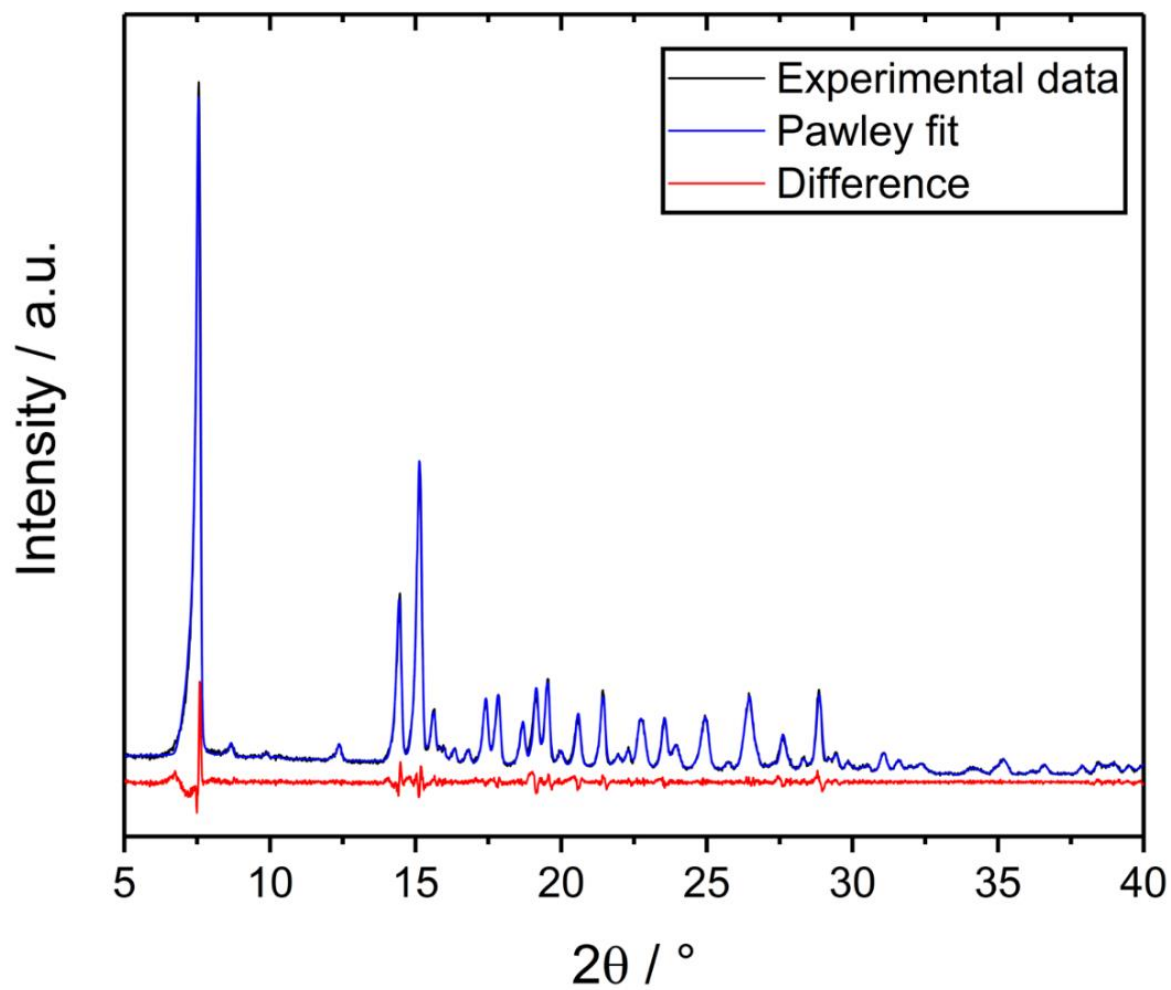

**Figure S1.** Pawley fitting of experimental MFM-303 bulk sample confirming the phase-purity of the material ( $\lambda = 1.5406$ ,  $R_p=6.280\%$ ,  $R_{wp} = 8.264\%$ , goodness-of-fit = 2.070).

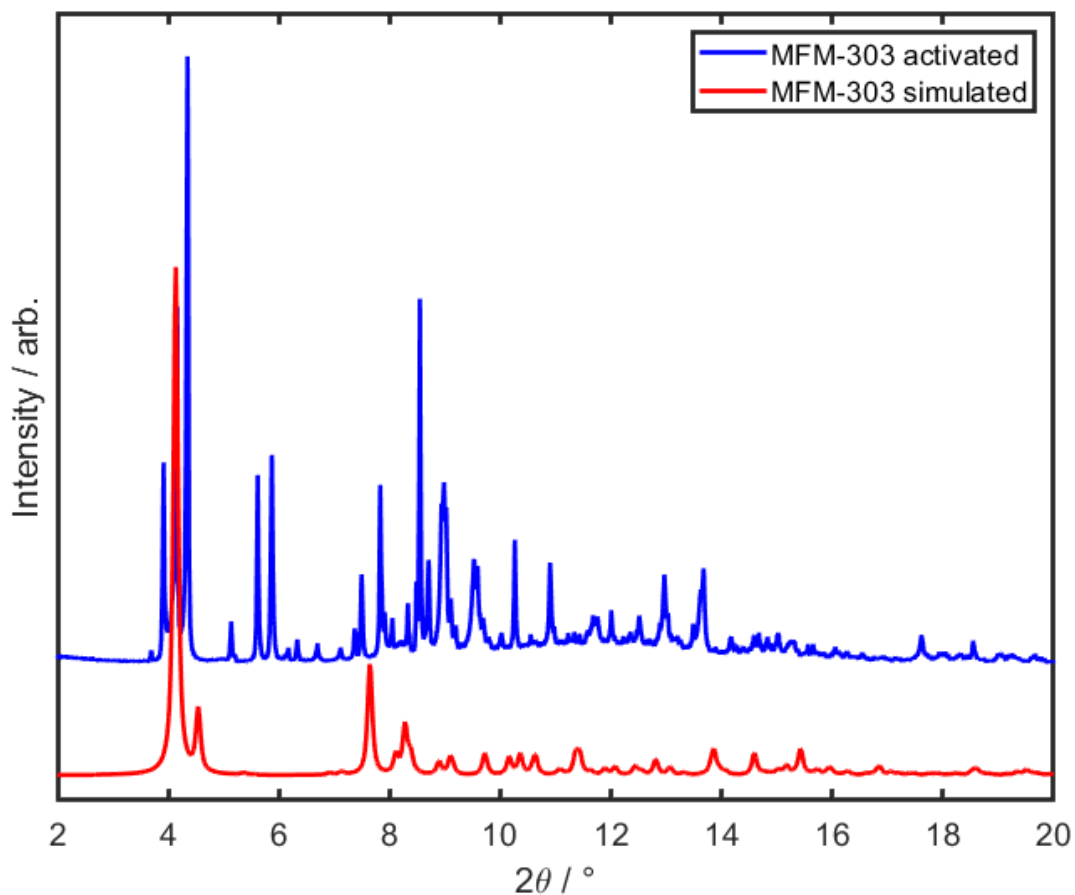

**Figure S2.** Synchrotron X-ray diffraction data for MFM-303(A1); simulated from the crystal structure of the as-synthesised material and for the *in situ* activated material ( $\lambda = 0.825774$ ). Due to the low symmetry of the activated structure with significant overlap of Bragg peaks in a triclinic system, the structure of activated material unfortunately cannot be determined despite our best efforts. However, when guest molecules enter the MOF, the structure returns to its original monoclinic crystal system.

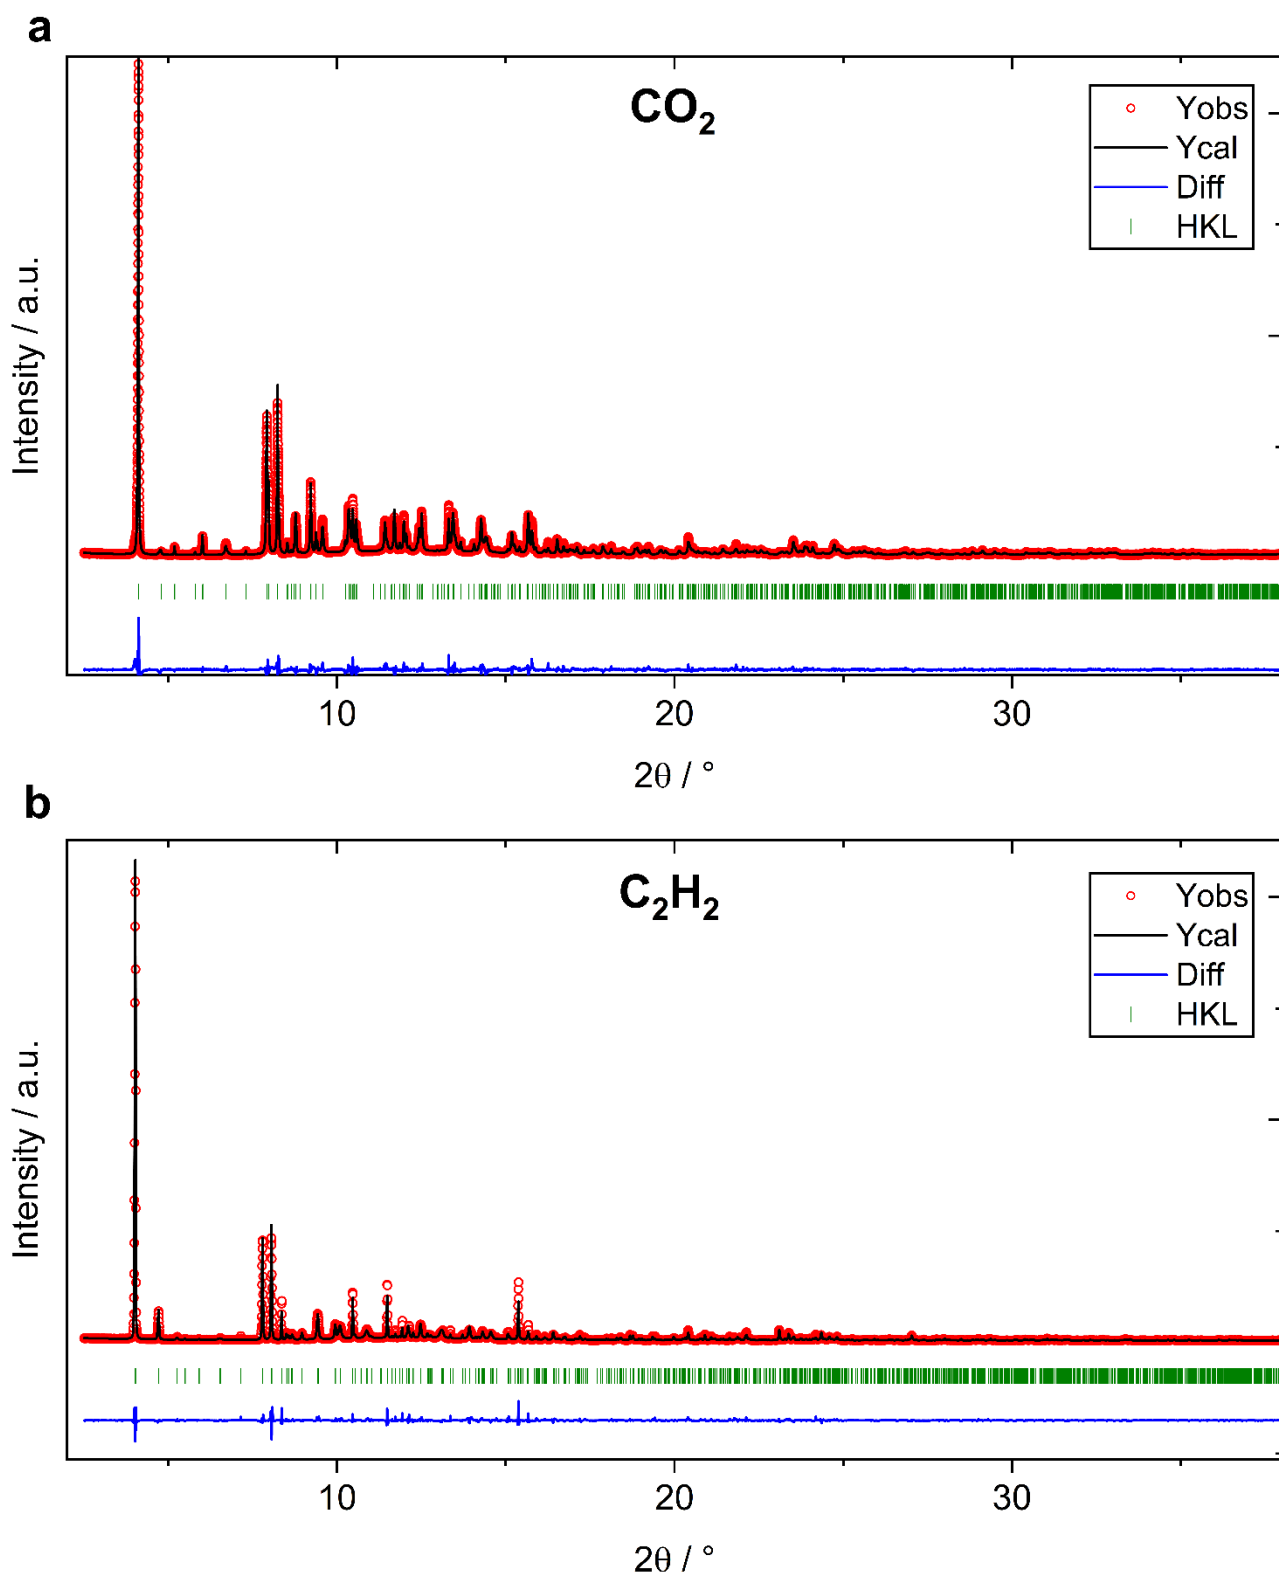

**Figure S3.** Rietveld refinement for (a) CO<sub>2</sub>@MFM-303(Al); (b) C<sub>2</sub>H<sub>2</sub>@MFM-303(Al).

### 3. Isotherms

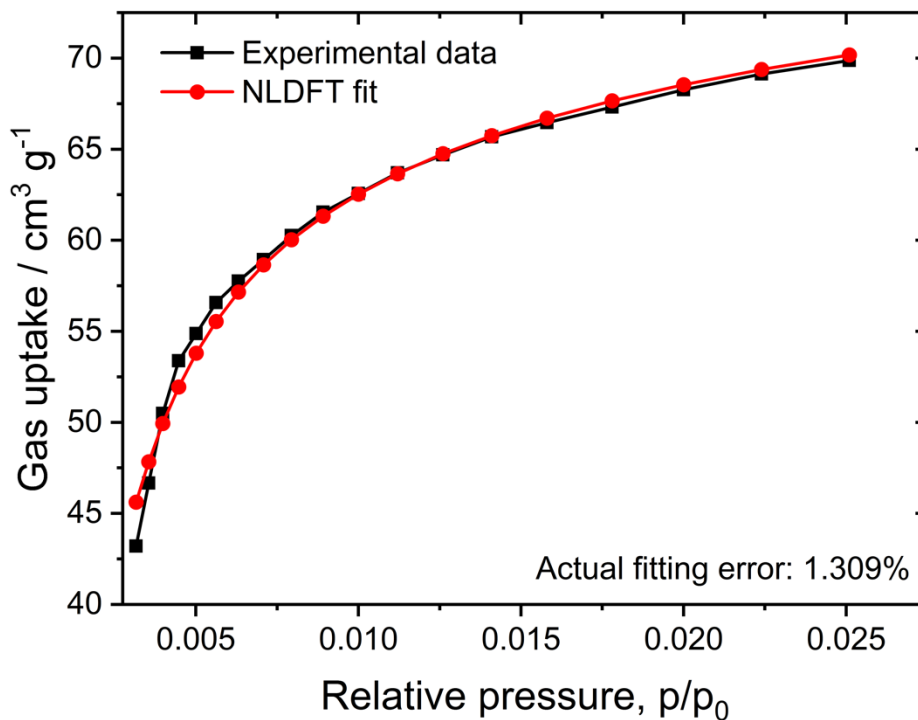

**Figure S4.** N<sub>2</sub> isotherm for MFM-303(AI) at 77 K with NLDFT fitting used to calculate the surface area of 724 m<sup>2</sup> g<sup>-1</sup>.

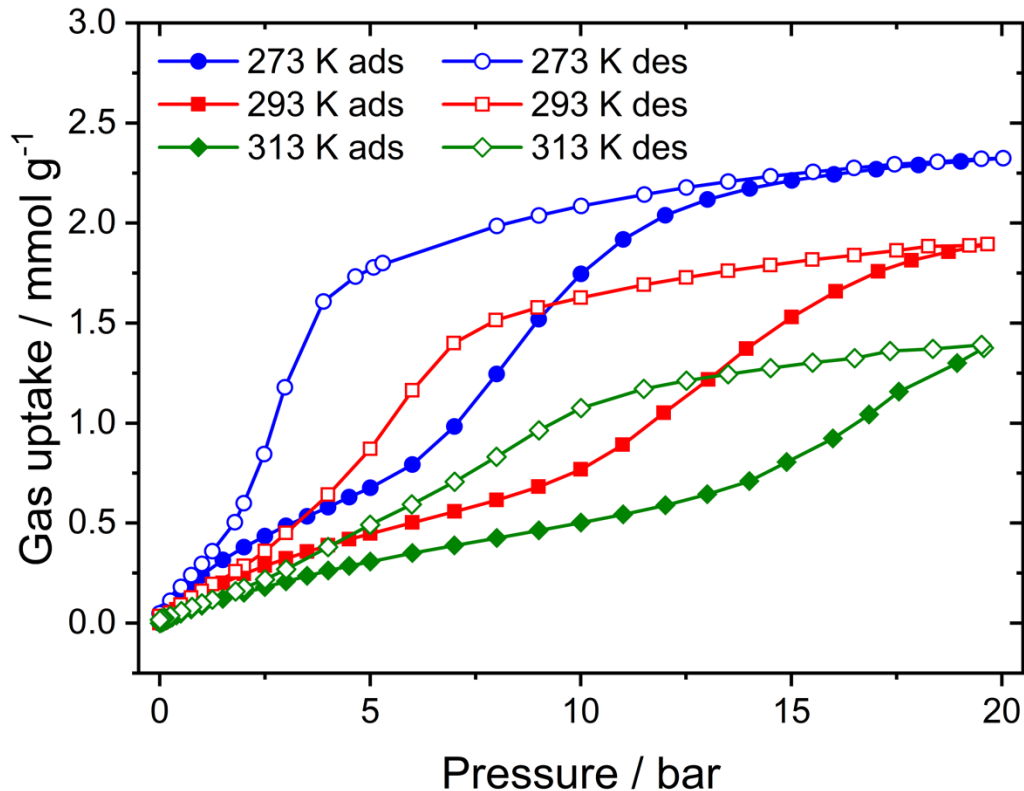

**Figure S5.** CH<sub>4</sub> isotherms for MFM-303(AI) collected at various temperatures up to 20 bar. It was found that the uptake was considerably lower than for any of the other hydrocarbons measured, with 0.15 mmol g<sup>-1</sup> CH<sub>4</sub> adsorbed at 293 K, 1 bar.



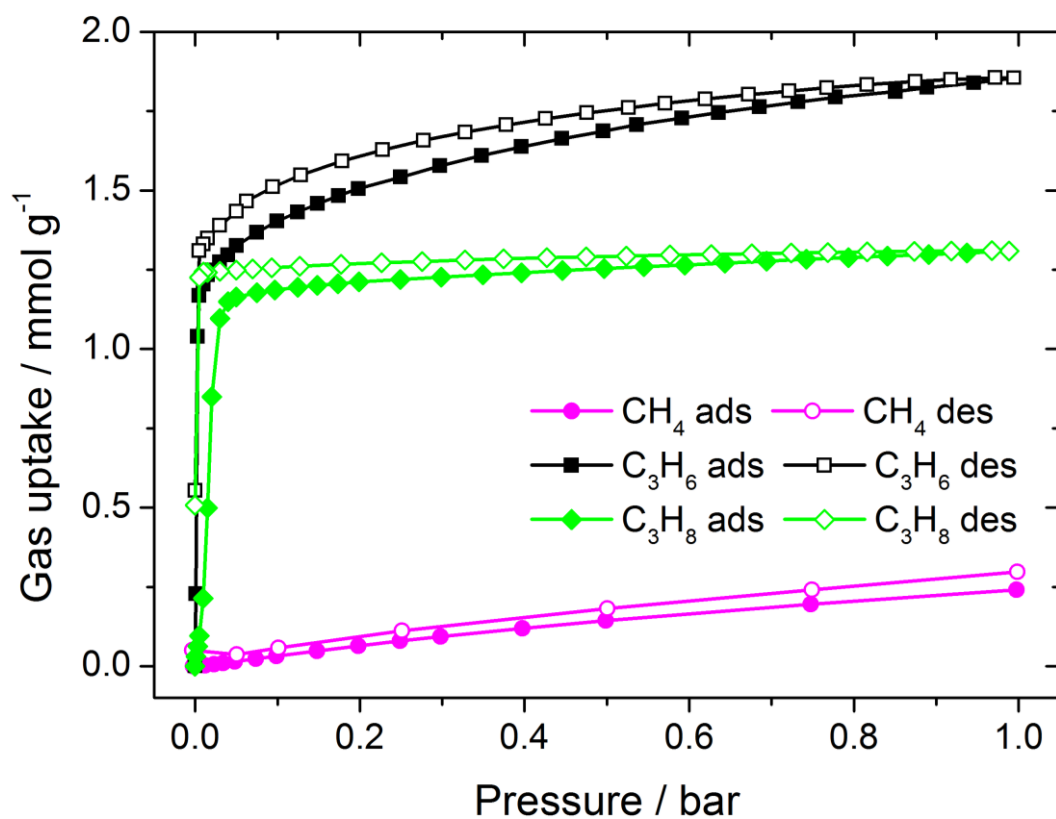

**Figure S6.** CH<sub>4</sub> and C<sub>3</sub> hydrocarbon isotherms for MFM-303(Al) collected at 293 K, up to 1 bar.

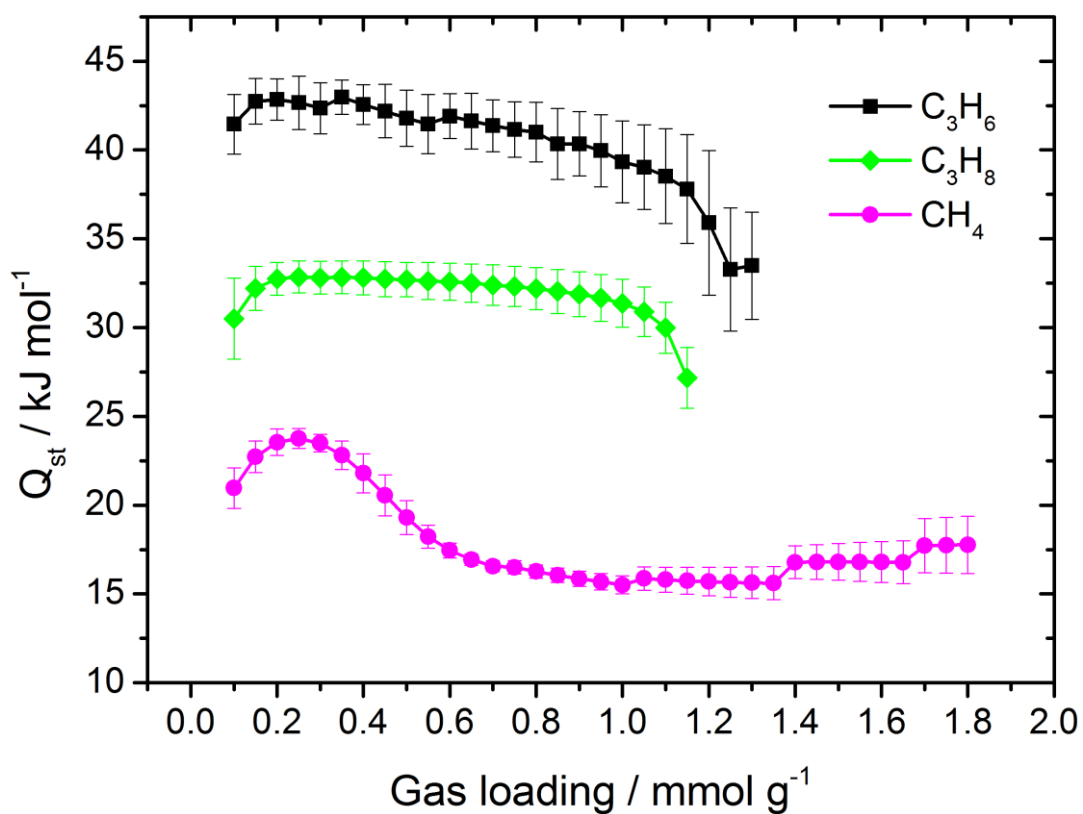

**Figure S7.** Isothermic heat of adsorption for CH<sub>4</sub> and C<sub>3</sub> hydrocarbon isotherms for MFM-303(Al).

#### 4. Thermodynamic data

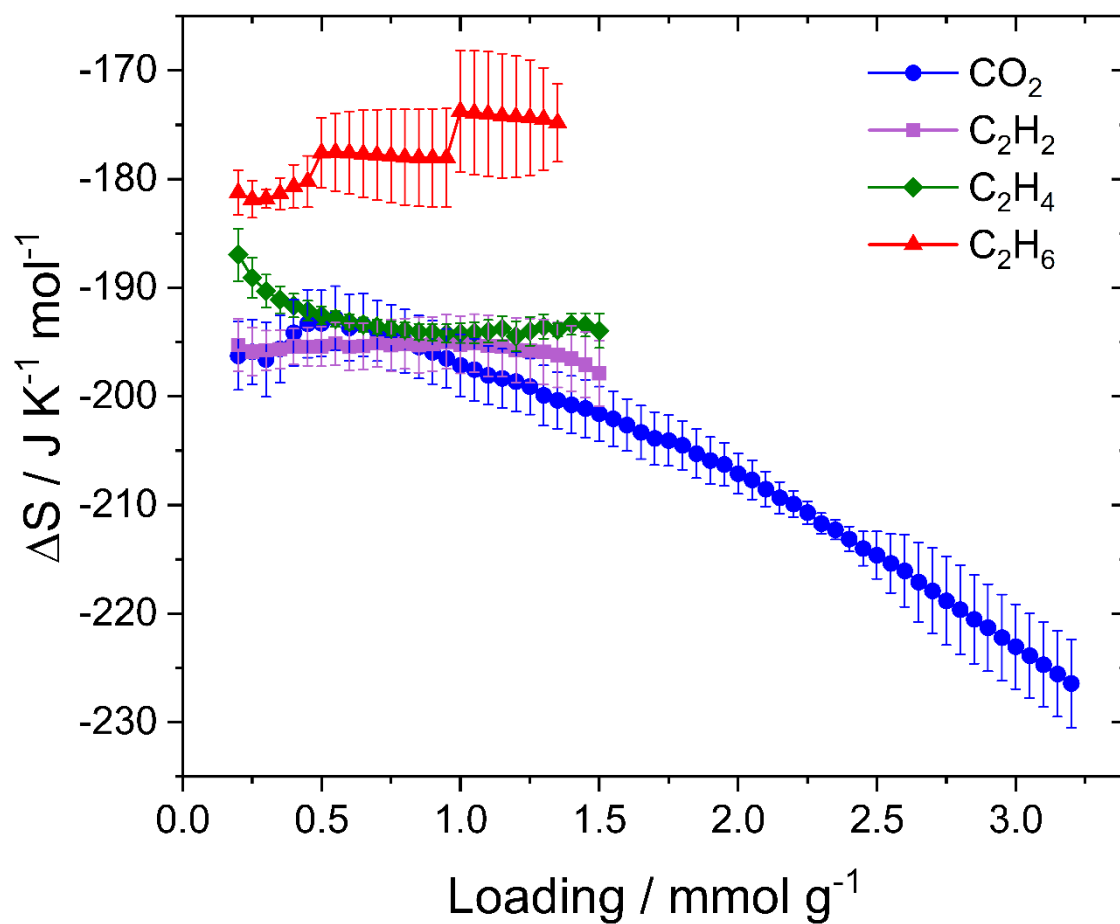

**Figure S8.** Entropy of adsorption ( $\Delta S$ ) for CO<sub>2</sub> and C<sub>2</sub> hydrocarbons, calculated from isothermal data for MFM-303(AI).

## 5. Fitting of isotherms to the dual-site Langmuir-Freundlich model

The adsorption isotherms of  $C_2H_2$ ,  $C_2H_4$ ,  $C_2H_6$  and  $CH_4$  were fitted using the dual-site Langmuir-Freundlich (DSLFL) model according to the equation:

$$n = \frac{q_{sat1}b_1P^{v_1}}{1 + b_1P^{v_1}} + \frac{q_{sat2}b_2P^{v_2}}{1 + b_2P^{v_2}}$$

where  $n$  is the amount of gas adsorbed ( $mmol\ g^{-1}$ ),  $q_{sati}$  is the saturation pressure for each site ( $mmol\ g^{-1}$ ),  $b_i$  is the Langmuir parameter ( $bar^{-1}$ ),  $v_i$  is the Freundlich parameter for each site,  $P$  is the pressure in bar. Examples of fitted isotherms are given in Figure S8.

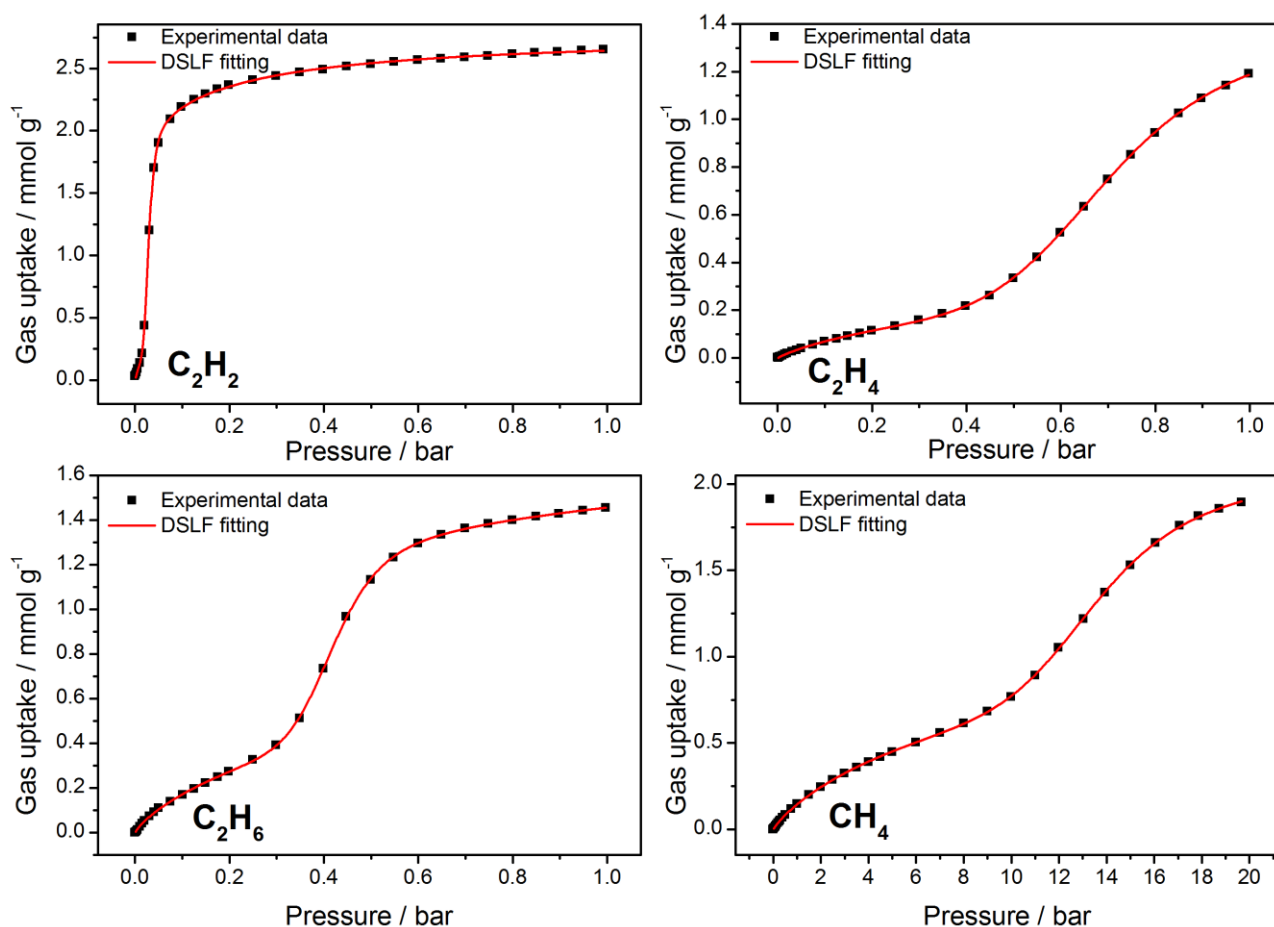

Figure S9. Example isotherms at 293 K with fits to the dual-site Langmuir-Freundlich model.

## 6. Analysis and derivation of the isosteric heat of adsorption for gases

The isosteric enthalpy of adsorption ( $\Delta H$ ) and entropy ( $\Delta S$ ) were calculated by fitting isotherms to the Van 't Hoff equation at a number of loadings:

$$\ln P = -\frac{\Delta H}{RT} + \frac{\Delta S}{R}$$

where  $P$  is pressure in Pa,  $T$  is the temperature and  $R$  is ideal gas constant. Linear fittings for  $\text{C}_2\text{H}_2$ ,  $\text{C}_2\text{H}_4$ ,  $\text{CO}_2$ ,  $\text{C}_3\text{H}_8$  gave  $R^2$  above 0.99, with fittings for  $\text{CH}_4$ ,  $\text{C}_2\text{H}_6$  and  $\text{C}_3\text{H}_6$  having  $R^2$  above 0.97 indicating a good quality fit to the isotherm data.

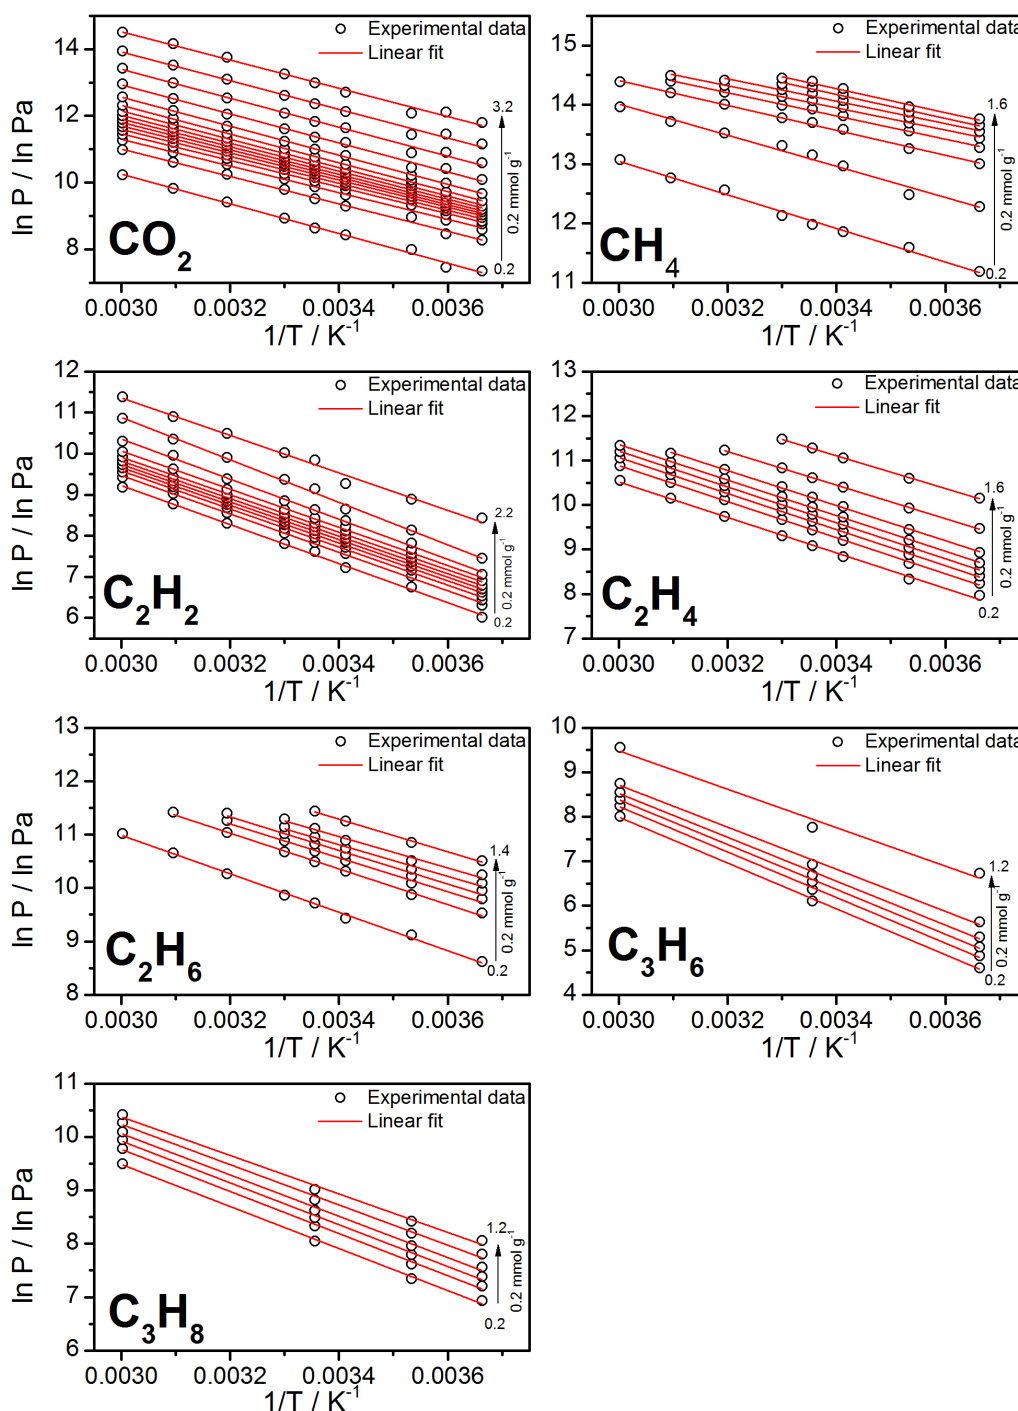

**Figure S10.** Linear fitting of  $1/T$  vs  $\ln P$  to determine the isosteric heat of adsorption for different gases at different loadings using the Van't Hoff equation.

## 7. IAST selectivity data

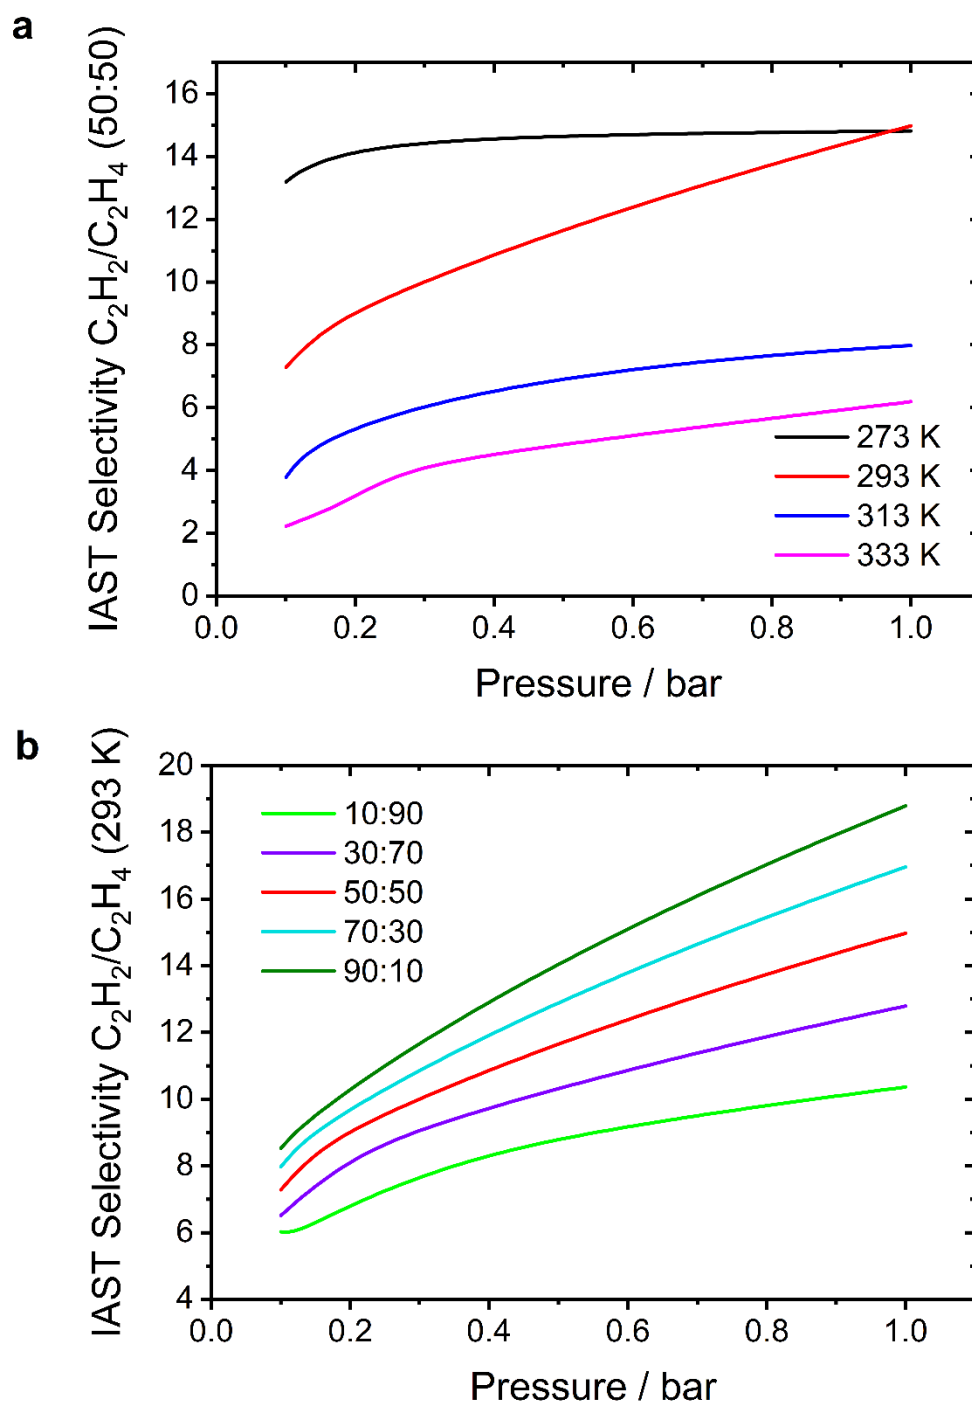

**Figure S11.** IAST selectivity data for  $C_2H_2/C_2H_4$  in MFM-303(Al) at different temperatures for (a) equimolar mixtures and (b) different molar ratios at 293 K.

## 8. Density Functional Theory (DFT) Calculations

Modelling by Density Functional Theory (DFT) of the bare, CO<sub>2</sub>- and C<sub>2</sub>H<sub>2</sub>-loaded MOFs was performed using the Vienna Ab initio Simulation Package (VASP).<sup>2</sup> The calculation used the Projector Augmented Wave (PAW) method<sup>3,4</sup> to describe the effects of core electrons, and Perdew-Burke-Ernzerhof (PBE)<sup>5</sup> implementation of the Generalized Gradient Approximation (GGA) for the exchange-correlation functional. Energy cutoff was 800 eV for the plane-wave basis of the valence electrons. The lattice parameters and atomic coordinates determined by synchrotron X-ray single crystal diffraction in this work were used as the initial structure. Due to the large unit cell (~300 atoms), all electronic structure and phonon calculations were performed on the  $\Gamma$  point only. The total energy tolerance for electronic energy minimization was 10<sup>-8</sup> eV, and for structure optimization it was 10<sup>-7</sup> eV. The maximum interatomic force after relaxation was below 0.001 eV/Å. The optB86b-vdW functional<sup>6</sup> for dispersion corrections was applied. The vibrational eigenfrequencies and modes were then calculated by solving the force constants and dynamical matrix using Phonopy.<sup>7</sup> The OClimax software<sup>8,9</sup> was used to convert the DFT-calculated phonon results to the simulated INS spectra.

## 9. Additional views of crystal structures

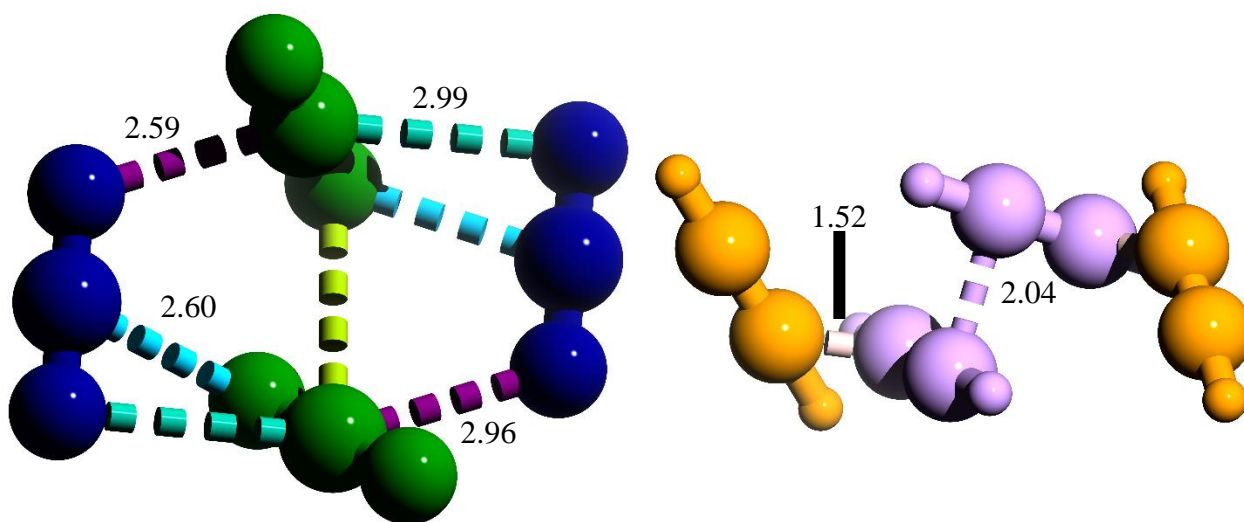

**Figure S12.** Views of guest-loaded MFM-303(Al) showing the intermolecular interactions between the adsorbed gas molecules at different sites. (a) CO<sub>2</sub> (blue, site I; green, site II), (b) C<sub>2</sub>H<sub>2</sub> (orange, site I; pink, site II).

## 10. Comparisons to other MOFs

**Table S2.** Comparison of adsorption uptakes and IAST selectivities for various MOFs

|                                                                                       | MFM-300(Al) <sup>10,11</sup> | Fe-MOF-74 <sup>12-14</sup> | SIFSIX-2-Cu-1 <sup>15,16</sup> | PCM-48 <sup>17</sup> | UiO-66-(COOH) <sub>2</sub> <sup>18-20</sup> | Ni-gallate <sup>21-23</sup> | ZJU-72 <sup>24</sup> | NTU-72 <sup>25</sup> | UTSA-100 <sup>26</sup> | BSF-10 <sup>27</sup> | NbU-7-Cl <sup>28</sup> | MFM-303(Al) |
|---------------------------------------------------------------------------------------|------------------------------|----------------------------|--------------------------------|----------------------|---------------------------------------------|-----------------------------|----------------------|----------------------|------------------------|----------------------|------------------------|-------------|
| Surface area / m <sup>2</sup> g <sup>-1</sup>                                         | 1370                         | 1350                       | 503                            | 575                  | 622                                         | 424                         | 1184                 | 315                  | 970                    | 426                  | 507.8                  | 724         |
| Pore volume / cm <sup>3</sup> g <sup>-1</sup>                                         | 0.375                        | 0.626                      | 0.26                           | 0.17                 | 0.21                                        | 0.18                        | 0.635                | 0.415                | 0.399                  | 0.216                | 0.709                  | 0.194       |
| Pore size / Å                                                                         | 6.5 x 6.5                    | 11 x 11                    | 5.2 x 5.2                      | ~7 x ~13             | 4.8 x 4.8                                   | 3.5 x 4.8                   | 4.8 x 4.8            | 4.3 x 4.8            | 4.3 x 4.3              | 4 x 9                | 4.2 x 4.2              | ~8 x ~2.4   |
| CO <sub>2</sub> uptake at 1 bar, 273 K / mmol g <sup>-1</sup>                         | 7.0                          | 6.47*                      | 5.40*                          | 1.21                 | 3.0                                         | 7.0                         | 6.19                 | 0.9*                 | -                      | 1.75 <sup>o</sup>    | 1.96                   | 3.1         |
| CO <sub>2</sub> uptake at 0.1 bar, 273 K / mmol g <sup>-1</sup>                       | 1.80                         | 3.61*                      | 1.72*                          | 0.19                 | 0.7                                         | 5.8                         | -                    | 0.2*                 | -                      | 0.28 <sup>o</sup>    | 0.44                   | 1.84        |
| C <sub>2</sub> H <sub>2</sub> uptake at 1 bar, 293 K / mmol g <sup>-1</sup>           | 6.34                         | 6.8 <sup>†</sup>           | 4.02*                          | 1.14 <sup>Δ</sup>    | 2.2*                                        | 3.64*                       | 7.49*                | 1.84*                | 4.27 <sup>Δ</sup>      | 2.9*                 | 2.51                   | 2.65        |
| C <sub>2</sub> H <sub>4</sub> uptake at 1 bar, 293 K / mmol g <sup>-1</sup>           | 4.28                         | 6.1 <sup>†</sup>           | 2.19*                          | 0.88 <sup>Δ</sup>    | 1.8*                                        | 1.97*                       | -                    | 0.97*                | 1.66 <sup>Δ</sup>      | 1.76*                | 1.36                   | 1.75        |
| C <sub>2</sub> H <sub>6</sub> uptake at 1 bar, 293 K / mmol g <sup>-1</sup>           | 0.85                         | 5.0 <sup>†</sup>           | -                              | 0.96 <sup>Δ</sup>    | 1.8*                                        | 0.28*                       | -                    | -                    | -                      | -                    | -                      | 1.45        |
| CH <sub>4</sub> uptake at 1 bar, 293 K / mmol g <sup>-1</sup>                         | 0.29                         | 0.8 <sup>†</sup>           | 0.47*                          | 0.29 <sup>Δ</sup>    | 0.29 (303 K, 1.                             | 0.29 298 K                  | 1.12 298 K           | -                    | -                      | -                    | -                      | 0.15        |
| Selectivity C <sub>2</sub> H <sub>2</sub> /C <sub>2</sub> H <sub>4</sub> <sup>‡</sup> | 2.30                         | 1.87                       | 41.0                           | 1.9                  | -                                           | 43.7 <sup>^</sup>           | -                    | 56 <sup>^</sup>      | ~20                    | 2.9                  | 4.0                    | 15.0        |
| Selectivity C <sub>2</sub> H <sub>4</sub> /C <sub>2</sub> H <sub>6</sub> <sup>‡</sup> | 48.7                         | 13.6                       | -                              | -                    | 0.9                                         | 16.8                        | -                    | -                    | -                      | -                    | -                      | 2.32        |
| Selectivity C <sub>2</sub> H <sub>6</sub> /CH <sub>4</sub> <sup>‡</sup>               | ~5.1                         | ~35                        | -                              | -                    | -                                           | -                           | -                    | -                    | -                      | -                    | -                      | 17.0        |
| Selectivity CO <sub>2</sub> /CH <sub>4</sub> <sup>‡</sup>                             | 51.6                         | 20.2                       | 33                             | 6.1                  | -                                           | -                           | 6.8                  | -                    | -                      | -                    | -                      | 56.1        |
| Q <sub>st</sub> (CO <sub>2</sub> ) <sup>#</sup> / kJ mol <sup>-1</sup>                | 30                           | 48-55                      | 31.9                           | 15.4                 | 33.6                                        | 37                          | 15.1                 | -                    | -                      | 27.4                 | 27.9                   | 37.0        |
| Q <sub>st</sub> (C <sub>2</sub> H <sub>2</sub> ) <sup>#</sup> / kJ mol <sup>-1</sup>  | 32                           | 47                         | 41.9                           | 23.6                 | 38.6                                        | 46                          | 9.7                  | 43.5                 | 22                     | 34.8                 | 36.6                   | 39.5        |
| Q <sub>st</sub> (C <sub>2</sub> H <sub>4</sub> ) <sup>#</sup> / kJ mol <sup>-1</sup>  | 16                           | 45                         | 30.7                           | 23.2                 | 27.4                                        | 32                          | -                    | 36.7                 | -                      | 22.9                 | 25.9                   | 33.2        |
| Q <sub>st</sub> (C <sub>2</sub> H <sub>6</sub> ) <sup>#</sup> / kJ mol <sup>-1</sup>  | 11                           | 25                         | -                              | 23.4                 | 26.8                                        | -                           | -                    | -                    | -                      | -                    | -                      | 30.0        |
| Q <sub>st</sub> (CH <sub>4</sub> ) <sup>#</sup> / kJ mol <sup>-1</sup>                | -                            | 20                         | -                              | 11.4                 | -                                           | -                           | 9.3                  | -                    | -                      | -                    | -                      | 19          |

\*298 K data and hence slightly higher uptakes are expected for isotherms at lower temperatures. <sup>†</sup> measured at 318 K. <sup>Δ</sup> measured at 296 K. <sup>o</sup> measured at 278 K. <sup>‡</sup>IAST selectivity for an equimolar mixture at 1 bar. <sup>^</sup>IAST selectivity for a 1:99 mixture at 1 bar. <sup>#</sup>Q<sub>st</sub> values at low surface coverage.

## 11. Physical properties of common adsorbates

**Table S3.** Physical properties of common adsorbates<sup>29</sup>

| <b>Adsorbate</b>              | <b>Kinetic diameter / Å</b> | <b>Polarizability / x 10<sup>-25</sup> cm<sup>3</sup></b> | <b>Critical temperature / K</b> |
|-------------------------------|-----------------------------|-----------------------------------------------------------|---------------------------------|
| CO <sub>2</sub>               | 3.3                         | 29.11                                                     | 304.12                          |
| CH <sub>4</sub>               | 3.758                       | 25.93                                                     | 98.60                           |
| C <sub>2</sub> H <sub>2</sub> | 3.3                         | 33.3-39.3                                                 | 308.30                          |
| C <sub>2</sub> H <sub>4</sub> | 4.163                       | 42.52                                                     | 282.34                          |
| C <sub>2</sub> H <sub>6</sub> | 4.443                       | 44.3-44.7                                                 | 305.32                          |
| C <sub>3</sub> H <sub>6</sub> | 4.687                       | 56.6                                                      | 364.90                          |
| C <sub>3</sub> H <sub>8</sub> | 4.3-5.118                   | 62.9-63.7                                                 | 369.83                          |



## 12. Supplementary references

- 1 S. Yang, J. Sun, A. J. Ramirez-Cuesta, S. K. Callear, W. I. F. David, D. P. Anderson, R. Newby, A. J. Blake, J. E. Parker, C. C. Tang and M. Schröder, *Nat. Chem.*, 2012, **4**, 887–894.
- 2 G. Kresse and J. Furthmüller, *Phys. Rev. B*, 1996, **54**, 11169–11186.
- 3 P. E. Blöchl, *Phys. Rev. B*, 1994, **50**, 17953–17979.
- 4 G. Kresse and D. Joubert, *Phys. Rev. B*, 1999, **59**, 1758–1775.
- 5 J. P. Perdew, K. Burke and M. Ernzerhof, *Phys. Rev. Lett.*, 1996, **77**, 3865–3868.
- 6 J. Klimeš, D. R. Bowler and A. Michaelides, *J. Phys. Condens. Matter*, 2010, **22**, 022201.
- 7 A. Togo and I. Tanaka, *Scr. Mater.*, 2015, **108**, 1–5.
- 8 Y. Q. Cheng, L. L. Daemen, A. I. Kolesnikov and A. J. Ramirez-Cuesta, *J. Chem. Theory Comput.*, 2019, **15**, 1974–1982.
- 9 Y. Cheng, L. L. Daemen, A. I. Kolesnikov and A. J. Ramirez-Cuesta, OCLIMAX, Oak Ridge National Laboratory, Oak Ridge, Tennessee 2019.
- 10 S. Yang, J. Sun, A. J. Ramirez-Cuesta, S. K. Callear, W. I. F. David, D. P. Anderson, R. Newby, A. J. Blake, J. E. Parker, C. C. Tang and M. Schröder, *Nat. Chem.*, 2012, **4**, 887–894.
- 11 S. Yang, A. J. Ramirez-Cuesta, R. Newby, V. Garcia-Sakai, P. Manuel, S. K. Callear, S. I. Campbell, C. C. Tang and M. Schröder, *Nat. Chem.*, 2014, **7**, 121–129.
- 12 S. J. Geier, J. A. Mason, E. D. Bloch, W. L. Queen, M. R. Hudson, C. M. Brown and J. R. Long, *Chem. Sci.*, 2013, **4**, 2054–2061.
- 13 E. D. Bloch, W. L. Queen, R. Krishna, J. M. Zadrozny, C. M. Brown and J. R. Long, *Science*, 2012, **335**, 1606–1610.
- 14 W. Lou, J. Yang, L. Li and J. Li, *J. Solid State Chem.*, 2014, **213**, 224–228.
- 15 X. Cui, K. Chen, H. Xing, Q. Yang, R. Krishna, Z. Bao, H. Wu, W. Zhou, X. Dong, Y. Han, B. Li, Q. Ren, M. J. Zaworotko and B. Chen, *Science*, 2016, **353**, 141–144.
- 16 P. Nugent, Y. Belmabkhout, S. D. Burd, A. J. Cairns, R. Luebke, K. Forrest, T. Pham, S. Ma, B. Space, L. Wojtas, M. Eddaoudi and M. J. Zaworotko, *Nature*, 2013, **495**, 80–84.
- 17 J. E. Reynolds, K. M. Walsh, B. Li, P. Kunal, B. Chen and S. M. Humphrey, *Chem. Commun.*, 2018, **54**, 9937–9940.
- 18 J. M. Taylor, K. W. Dawson and G. K. H. Shimizu, *J. Am. Chem. Soc.*, 2013, **135**, 1193–1196.
- 19 L. Zhang, L. Li, E. Hu, L. Yang, K. Shao, L. Yao, K. Jiang, Y. Cui, Y. Yang, B. Li, B. Chen and G. Qian, *Adv. Sci.*, 2020, **7**, 1–7.
- 20 L. Zhang, K. Jiang, L. Yang, L. Li, E. Hu, L. Yang, K. Shao, H. Xing, Y. Cui, Y. Yang, B. Li, B. Chen and G. Qian, *Angew. Chemie Int. Ed.*, 2021, **60**, 15995–16002.
- 21 J. Wang, L. Li, L. Guo, Y. Zhao, D. Xie, Z. Zhang, Q. Yang, Y. Yang, Z. Bao and Q. Ren, *Chem. – Eur. J.*, 2019, **25**, 15516–15524.
- 22 F. Chen, D. Lai, L. Guo, J. Wang, P. Zhang, K. Wu, Z. Zhang, Q. Yang, Y. Yang, B. Chen, Q. Ren and Z. Bao, *J. Am. Chem. Soc.*, 2021, **143**, 9040–9047.
- 23 Z. Bao, J. Wang, Z. Zhang, H. Xing, Q. Yang, Y. Yang, H. Wu, R. Krishna, W. Zhou, B. Chen and Q. Ren, *Angew. Chemie Int. Ed.*, 2018, **57**, 16020–16025.
- 24 X. Duan, R. Song, J. Yu, H. Wang, Y. Cui, Y. Yang, B. Chen and G. Qian, *RSC Adv.*, 2014, **4**, 36419.
- 25 Y. Duan, Y. Huang, C. Wang, Q. Wang, K. Ge, Z. Lu, H. Wang, J. Duan, J. Bai and W. Jin, *Chem. Sci.*, 2023, **14**, 4605–4611.
- 26 T.-L. Hu, H. Wang, B. Li, R. Krishna, H. Wu, W. Zhou, Y. Zhao, Y. Han, X. Wang, W. Zhu, Z. Yao, S. Xiang and B. Chen, *Nat. Commun.*, 2015, **6**, 7328.
- 27 W. Sun, Y. Jin, Y. Wu, W. Lou, Y. Yuan, S. Duttwyler, L. Wang and Y. Zhang, *Inorg. Chem. Front.*, 2022, **9**, 5140–5147.
- 28 J. Wu, Y. Wang, J. P. Xue, D. Wu and J. Li, *Inorg. Chem.*, 2023, **62**, 19997–20004.
- 29 J. Lee, O. K. Farha, J. Roberts, K. A. Scheidt, S. T. Nguyen and J. T. Hupp, *Chem Soc Rev*, 2009, **38**, 1450–1459.
